# Supplementary material for: RNA viruses of Amblyomma variegatum and Rhipicephalus microplus and Cattle Susceptibility in the French Antilles
Source: Preprints.org preprint supplement (doi:10.20944/preprints201912.0172.v1), 2019-12-12
Supplement: Supplementary file 3 [file supplementary]

## Sheet: Suplem.TableS1
Table S1. List of tick-borne viruses targeted by the microfluidic PCR system (Gondard et al., 2018)
Family	Genus	Species
Asfarviridae	Asfivirus	African swine fever virus
Orthomyxoviridae	Thogotovirus	Thogoto virus
		Dhori virus
Reoviridae	Orbivirus	Kemerovo virus
	Coltivirus	Colorado tick fever virus
		Eyach virus (EYAV)
Bunyaviridae	Nairovirus	Crimean-Congo Hemorrhagic fever virus (CCHF)
		Dugbe virus
		Nairobi sheep disease virus (NSDV)
	Phlebovirus	Uukuniemi virus (UUKV)
	Orthobunyavirus	Schmallenberg
Flaviviridae	Flavivirus	Tick-borne encephalitis virus European subtype (TBE)
		Tick-borne encephalitis virus Far-Eastern subtype (TBE)
		Tick-borne encephalitis virus Siberian subtype (TBE)
		Louping ill virus (LIV)
		Langat virus
		Deer tick virus
		Powassan virus (POWV)
		West Nile virus (WN)
		Meaban virus
		Omsk Hemorrhagic fever virus
		Kyasanur forest disease virus
